# Supplementary material
Source: publisher figshare collection journal article supplement (https://acs.figshare.com/ndownloader/files/4041070)
Supplement: Supplementary file 1 [file 4041070]

**Supporting Information for**

**Deactivation of Ru Catalysts under Catalytic CO Oxidation by  
Formation of Bulk Ru Oxide Probed with Ambient Pressure XPS**

Kamran Qadir,<sup>†</sup> Sun Mi Kim,<sup>†</sup> Hyungtak Seo,<sup>‡</sup> Bongjin S. Mun,<sup>¶</sup> Funda Aksoy,<sup>||, #</sup> Zhi Liu,<sup>||</sup> and  
Jeong Young Park<sup>†,\*</sup>

*<sup>†</sup>Graduate School of EEWS (WCU), and NanoCentury KI, KAIST, and Center for Nanomaterials and  
Chemical Reactions, Institute of Basic Science, Daejeon, 305-701 South Korea*

*<sup>‡</sup> Department of Materials Science & Engineering, Ajou University, Suwon 443-749, Republic of  
Korea*

*<sup>¶</sup>Department of Applied Physics, Hanyang University ERICA, Ansan, 426-791 South Korea and Ertl  
Center for Electrochemistry and Catalysis, Gwangju Institute of Science and Technology, Gwangju  
500-712, South Korea*

*<sup>||</sup>Advanced Light Source, Lawrence Berkeley National Laboratory, Berkeley CA 94720 , United  
States*

*\*To whom correspondence should be addressed: Jeong Young Park, 373-1 Guseong-Dong,  
Daejeon 305-701, Republic of Korea, Phone: +82-42-350-1713, jeongypark@kaist.ac.kr*

**KEYWORDS:** CO oxidation, Ru thin film, oxidation state, catalytic activity, ambient-pressure  
X-ray photoelectron spectroscopy

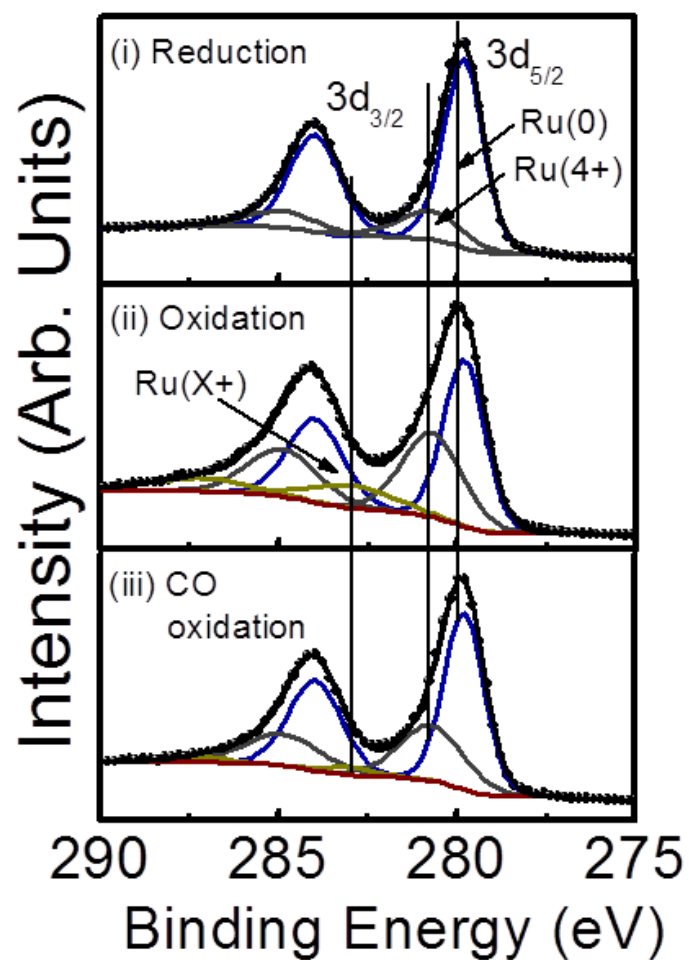

Figure S1: Ru3d spectra showing the surface oxidation states of Ru on a Ru film at 200 °C at an incident photon energy of 825 eV: (i) reduction under 80 mTorr CO (ii) oxidation under 200 mTorr O<sub>2</sub>, and (iii) catalytic CO oxidation under 200 mTorr O<sub>2</sub> and 80 mTorr CO.
